# Supplementary material for: Advances in Phototriggered Synthesis of Single-Chain Polymer Nanoparticles
Source: Preprints.org preprint supplement (doi:10.20944/preprints201910.0351.v1), 2019-10-30
Supplement: Supplementary file 1 [file supplementary]

# Advances in Phototriggered Synthesis of Single-Chain polymer Nanoparticles

## Copyrights

Figure 1 a)

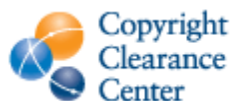

# RightsLink®

[Home](#)[Create Account](#)[Help](#)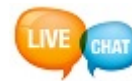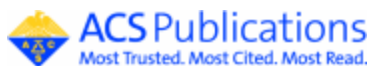

**Title:** A Paternò–Büchi Approach to the Synthesis of Merrilactone A  
**Author:** Jone Iriondo-Alberdi, Jesus E. Perea-Buceta, Michael F. Greaney  
**Publication:** Organic Letters  
**Publisher:** American Chemical Society  
**Date:** Sep 1, 2005  
Copyright © 2005, American Chemical Society

**LOGIN**

If you're a **copyright.com user**, you can login to RightsLink using your copyright.com credentials.

Already a **RightsLink user** or want to [learn more?](#)

**PERMISSION/LICENSE IS GRANTED FOR YOUR ORDER AT NO CHARGE**

This type of permission/license, instead of the standard Terms & Conditions, is sent to you because no fee is being charged for your order. Please note the following:

- Permission is granted for your request in both print and electronic formats, and translations.
- If figures and/or tables were requested, they may be adapted or used in part.
- Please print this page for your records and send a copy of it to your publisher/graduate school.
- Appropriate credit for the requested material should be given as follows: "Reprinted (adapted) with permission from (COMPLETE REFERENCE CITATION). Copyright (YEAR) American Chemical Society." Insert appropriate information in place of the capitalized words.
- One-time permission is granted only for the use specified in your request. No additional uses are granted (such as derivative works or other editions). For any other uses, please submit a new request.

If credit is given to another source for the material you requested, permission must be obtained from that source.

[BACK](#)[CLOSE WINDOW](#)

Copyright © 2019 [Copyright Clearance Center, Inc.](#) All Rights Reserved. [Privacy statement.](#) [Terms and Conditions.](#)  
Comments? We would like to hear from you. E-mail us at [customercare@copyright.com](mailto:customercare@copyright.com)

Figure 1 b)

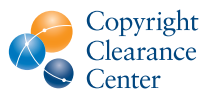

Marketplace™

## Order Confirmation

This is not an invoice. Please go to manage account to access your order history and invoices.

### CUSTOMER INFORMATION

#### Billing Address

Mr. Agustín Blázquez  
Materials Physic Center (MPC)  
Paseo Manuel de Lardizabal, 5  
San Sebastian, Guipuzcoa 20018  
Spain  
  
+34 608390647  
agustinblazquezmartin@gmail.com

#### Customer Location

Mr. Agustín Blázquez  
Materials Physic Center (MPC)  
Paseo Manuel de Lardizabal, 5  
San Sebastian, Guipuzcoa 20018  
Spain

#### PO Number (optional)

N/A

#### Payment options

Invoice

### PENDING ORDER CONFIRMATION

Total Due: 0,00 EUR

Confirmation Number: Pending

Order Date: 23-Oct-2019

#### 1. Dalton transactions

0,00 EUR

Order license ID  
ISSN  
Type of Use  
Publisher  
Portion

Pending  
1477-9234  
Republish in a journal/magazine  
ROYAL SOCIETY OF CHEMISTRY  
Image/photo/illustration

### LICENSED CONTENT

|                   |                                            |                  |                                                      |
|-------------------|--------------------------------------------|------------------|------------------------------------------------------|
| Publication Title | Dalton transactions                        | Country          | United Kingdom of Great Britain and Northern Ireland |
| Author/Editor     | Royal Society of Chemistry (Great Britain) | Rightsholder     | Royal Society of Chemistry                           |
| Date              | 01/01/2003                                 | Publication Type | e-Journal                                            |
| Language          | English                                    |                  |                                                      |

### REQUEST DETAILS

|              |                          |              |           |
|--------------|--------------------------|--------------|-----------|
| Portion Type | Image/photo/illustration | Distribution | Worldwide |
|--------------|--------------------------|--------------|-----------|

|                                           |                         |                             |                                  |
|-------------------------------------------|-------------------------|-----------------------------|----------------------------------|
| Number of images / photos / illustrations | 1                       | Translation                 | Original language of publication |
| Format (select all that apply)            | Print, Electronic       | Copies for the disabled?    | No                               |
| Who will republish the content?           | Academic institution    | Minor editing privileges?   | Yes                              |
| Duration of Use                           | Life of current edition | Incidental promotional use? | No                               |
| Lifetime Unit Quantity                    | More than 2,000,000     | Currency                    | EUR                              |
| Rights Requested                          | Main product            |                             |                                  |

## NEW WORK DETAILS

|             |                                                                |                                 |            |
|-------------|----------------------------------------------------------------|---------------------------------|------------|
| Title       | Advances in Phototriggered Synthesis of Single-Chain Polymer   | Publisher imprint               | N/A        |
| Author      | Ester Verde-Sesto, Agustín Blázquez-Martín and José A. Pomposo | Expected publication date       | 2019-11-20 |
| Publication | Polymers                                                       | Expected size (number of pages) | 20         |
| Publisher   | MDPI                                                           | Standard identifier             | N/A        |

## ADDITIONAL DETAILS

|                        |     |                                                               |                                                 |
|------------------------|-----|---------------------------------------------------------------|-------------------------------------------------|
| Order reference number | N/A | The requesting person / organization to appear on the license | Agustín Blázquez, Materials Physic Center (MPC) |
|------------------------|-----|---------------------------------------------------------------|-------------------------------------------------|

## REUSE CONTENT DETAILS

|                                                           |        |                                                  |                                            |
|-----------------------------------------------------------|--------|--------------------------------------------------|--------------------------------------------|
| Title, description or numeric reference of the portion(s) | Fig. 1 | Title of the article/chapter the portion is from | Why develop photoactivated chemotherapy?   |
| Editor of portion(s)                                      | N/A    | Author of portion(s)                             | Royal Society of Chemistry (Great Britain) |
| Volume of serial or monograph                             | N/A    | Issue, if republishing an article from a serial  | N/A                                        |
| Page or page range of portion                             | 1      | Publication date of portion                      | 2003-01-01                                 |

Order Total: 0,00 EUR

Total Items: 1

Total Due: 0,00 EUR

Accepted: All Publisher and CCC Terms and Conditions

Figure 1 c)

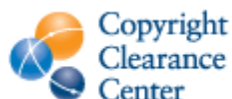

# RightsLink®

[Home](#)
[Account Info](#)
[Help](#)
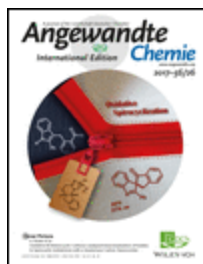

**Title:** Biologically Active Molecules with a "Light Switch"

**Author:** Alexander Heckel, Günter Mayer

**Publication:** Angewandte Chemie International Edition

**Publisher:** John Wiley and Sons

**Date:** Jul 20, 2006

Logged in as:  
Agustín Blázquez  
Materials Physic Center (MPC)  
Account #:  
3001540794

[LOGOUT](#)

Copyright © 2006 WILEY-VCH Verlag GmbH & Co. KGaA, Weinheim

## Order Completed

Thank you for your order.

This Agreement between Materials Physic Center (MPC) -- Agustín Blázquez ("You") and John Wiley and Sons ("John Wiley and Sons") consists of your license details and the terms and conditions provided by John Wiley and Sons and Copyright Clearance Center.

Your confirmation email will contain your order number for future reference.

### [printable details](#)

|                                                                                            |                                                                            |
|--------------------------------------------------------------------------------------------|----------------------------------------------------------------------------|
| License Number                                                                             | 4694690283785                                                              |
| License date                                                                               | Oct 23, 2019                                                               |
| Licensed Content Publisher                                                                 | John Wiley and Sons                                                        |
| Licensed Content Publication                                                               | Angewandte Chemie International Edition                                    |
| Licensed Content Title                                                                     | Biologically Active Molecules with a "Light Switch"                        |
| Licensed Content Author                                                                    | Alexander Heckel, Günter Mayer                                             |
| Licensed Content Date                                                                      | Jul 20, 2006                                                               |
| Licensed Content Volume                                                                    | 45                                                                         |
| Licensed Content Issue                                                                     | 30                                                                         |
| Licensed Content Pages                                                                     | 22                                                                         |
| Type of use                                                                                | Journal/Magazine                                                           |
| Requestor type                                                                             | University/Academic                                                        |
| Is the reuse sponsored by or associated with a pharmaceutical or medical products company? | no                                                                         |
| Format                                                                                     | Print and electronic                                                       |
| Portion                                                                                    | Figure/table                                                               |
| Number of figures/tables                                                                   | 1                                                                          |
| Original Wiley figure/table number(s)                                                      | Abstract figure                                                            |
| Will you be translating?                                                                   | No                                                                         |
| Circulation                                                                                | 50000 or greater                                                           |
| Title of new article                                                                       | Advances in Phototriggered Synthesis of Single-Chain Polymer Nanoparticles |
| Publication the new article is in                                                          | Polymers                                                                   |
| Publisher of new article                                                                   | MDPI                                                                       |
| Author of new article                                                                      | Ester Verde-Sesto, Agustín Blázquez_Martín and José A. Pomposo             |
| Expected publication date of new article                                                   | Nov 2019                                                                   |
| Estimated size of new                                                                      | 20                                                                         |

[article \(pages\)](#)[Requestor Location](#)Materials Physic Center (MPC)  
Paseo Manuel de Lardizabal, 5San Sebastian, Guipuzcoa 20018  
Spain  
Attn: Materials Physic Center (MPC)[Publisher Tax ID](#)

EU826007151

[Total](#)

0.00 EUR

**Would you like to purchase the full text of this article? If so, please continue on to the content ordering system located here: [Purchase PDF](#)**

**If you click on the buttons below or close this window, you will not be able to return to the content ordering system.**

[ORDER MORE](#)[CLOSE WINDOW](#)

Copyright © 2019 [Copyright Clearance Center, Inc.](#) All Rights Reserved. [Privacy statement.](#) [Terms and Conditions.](#)  
Comments? We would like to hear from you. E-mail us at [customercare@copyright.com](mailto:customercare@copyright.com)



Figure 1 d)



RightsLink®

Home

Create Account

Help

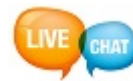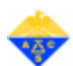ACS Publications  
Most Trusted. Most Cited. Most Read.**Title:**

Conformational Changes during Apoplastocyanin Folding Observed by Photocleavable Modification and Transient Grating

**Author:**

Shun Hirota, Yukari Fujimoto, Jungkwon Choi, et al

**Publication:**

Journal of the American Chemical Society

**Publisher:**

American Chemical Society

**Date:**

Jun 1, 2006

Copyright © 2006, American Chemical Society

**LOGIN**

If you're a **copyright.com user**, you can login to RightsLink using your copyright.com credentials.

Already a **RightsLink user** or want to [learn more?](#)

**PERMISSION/LICENSE IS GRANTED FOR YOUR ORDER AT NO CHARGE**

This type of permission/license, instead of the standard Terms & Conditions, is sent to you because no fee is being charged for your order. Please note the following:

- Permission is granted for your request in both print and electronic formats, and translations.
- If figures and/or tables were requested, they may be adapted or used in part.
- Please print this page for your records and send a copy of it to your publisher/graduate school.
- Appropriate credit for the requested material should be given as follows: "Reprinted (adapted) with permission from (COMPLETE REFERENCE CITATION). Copyright (YEAR) American Chemical Society." Insert appropriate information in place of the capitalized words.
- One-time permission is granted only for the use specified in your request. No additional uses are granted (such as derivative works or other editions). For any other uses, please submit a new request.

If credit is given to another source for the material you requested, permission must be obtained from that source.

BACK

CLOSE WINDOW

Copyright © 2019 [Copyright Clearance Center, Inc.](#) All Rights Reserved. [Privacy statement.](#) [Terms and Conditions.](#)  
Comments? We would like to hear from you. E-mail us at [customercare@copyright.com](mailto:customercare@copyright.com)

## Figure 3



RightsLink®

Home

Create Account

Help

ACS Publications  
Most Trusted. Most Cited. Most Read.**Title:**

CO2-Responsive Polymer Single-Chain Nanoparticles and Self-Assembly for Gas-Tunable Nanoreactors

**Author:**

Weizheng Fan, Xia Tong, Farhad Farnia, et al

**Publication:** Chemistry of Materials**Publisher:** American Chemical Society**Date:** Jul 1, 2017

Copyright © 2017, American Chemical Society

**LOGIN**

If you're a **copyright.com user**, you can login to RightsLink using your copyright.com credentials.

Already a **RightsLink user** or want to [learn more?](#)

**PERMISSION/LICENSE IS GRANTED FOR YOUR ORDER AT NO CHARGE**

This type of permission/license, instead of the standard Terms & Conditions, is sent to you because no fee is being charged for your order. Please note the following:

- Permission is granted for your request in both print and electronic formats, and translations.
- If figures and/or tables were requested, they may be adapted or used in part.
- Please print this page for your records and send a copy of it to your publisher/graduate school.
- Appropriate credit for the requested material should be given as follows: "Reprinted (adapted) with permission from (COMPLETE REFERENCE CITATION). Copyright (YEAR) American Chemical Society." Insert appropriate information in place of the capitalized words.
- One-time permission is granted only for the use specified in your request. No additional uses are granted (such as derivative works or other editions). For any other uses, please submit a new request.

If credit is given to another source for the material you requested, permission must be obtained from that source.

BACK

CLOSE WINDOW

Copyright © 2019 [Copyright Clearance Center, Inc.](#) All Rights Reserved. [Privacy statement.](#) [Terms and Conditions.](#)  
Comments? We would like to hear from you. E-mail us at [customercare@copyright.com](mailto:customercare@copyright.com)

## Figure 4



Marketplace™

## Order Confirmation

This is not an invoice. Please go to manage account to access your order history and invoices.

### CUSTOMER INFORMATION

#### Billing Address

Mr. Agustín Blázquez  
Materials Physic Center (MPC)  
Paseo Manuel de Lardizabal, 5  
San Sebastian, Guipuzcoa 20018  
Spain  
  
+34 608390647  
agustinblazquezmartin@gmail.com

#### Customer Location

Mr. Agustín Blázquez  
Materials Physic Center (MPC)  
Paseo Manuel de Lardizabal, 5  
San Sebastian, Guipuzcoa 20018  
Spain

#### PO Number (optional)

N/A

#### Payment options

Invoice

### PENDING ORDER CONFIRMATION

Total Due: 0,00 EUR

Confirmation Number: Pending

Order Date: 24-Oct-2019

#### 1. Dalton transactions

0,00 EUR

Order license ID  
ISSN  
Type of Use  
Publisher  
Portion

Pending  
1477-9234  
Republish in a journal/magazine  
ROYAL SOCIETY OF CHEMISTRY  
Image/photo/illustration

### LICENSED CONTENT

|                   |                                            |                  |                                                      |
|-------------------|--------------------------------------------|------------------|------------------------------------------------------|
| Publication Title | Dalton transactions                        | Country          | United Kingdom of Great Britain and Northern Ireland |
| Author/Editor     | Royal Society of Chemistry (Great Britain) | Rightsholder     | Royal Society of Chemistry                           |
| Date              | 01/01/2003                                 | Publication Type | e-Journal                                            |
| Language          | English                                    |                  |                                                      |

### REQUEST DETAILS

|              |                          |              |           |
|--------------|--------------------------|--------------|-----------|
| Portion Type | Image/photo/illustration | Distribution | Worldwide |
|--------------|--------------------------|--------------|-----------|

|                                           |                         |                             |                                  |
|-------------------------------------------|-------------------------|-----------------------------|----------------------------------|
| Number of images / photos / illustrations | 1                       | Translation                 | Original language of publication |
| Format (select all that apply)            | Print, Electronic       | Copies for the disabled?    | No                               |
| Who will republish the content?           | Not-for-profit entity   | Minor editing privileges?   | Yes                              |
| Duration of Use                           | Life of current edition | Incidental promotional use? | No                               |
| Lifetime Unit Quantity                    | More than 2,000,000     | Currency                    | EUR                              |
| Rights Requested                          | Main product            |                             |                                  |

## NEW WORK DETAILS

|             |                                                                            |                                 |            |
|-------------|----------------------------------------------------------------------------|---------------------------------|------------|
| Title       | Advances in Phototriggered Synthesis of Single-Chain Polymer Nanoparticles | Publisher imprint               | N/A        |
|             |                                                                            | Expected publication date       | 2019-11-20 |
| Author      | Ester Verde-Sesto, Agustín Blázquez-Martín and José A. Pomposo             | Expected size (number of pages) | 20         |
|             |                                                                            | Standard identifier             | N/A        |
| Publication | Polymers                                                                   |                                 |            |
| Publisher   | MDPI                                                                       |                                 |            |

## ADDITIONAL DETAILS

|                        |     |                                                               |                                                 |
|------------------------|-----|---------------------------------------------------------------|-------------------------------------------------|
| Order reference number | N/A | The requesting person / organization to appear on the license | Agustín Blázquez, Materials Physic Center (MPC) |
|------------------------|-----|---------------------------------------------------------------|-------------------------------------------------|

## REUSE CONTENT DETAILS

|                                                           |           |                                                  |                                                                                                                                |
|-----------------------------------------------------------|-----------|--------------------------------------------------|--------------------------------------------------------------------------------------------------------------------------------|
| Title, description or numeric reference of the portion(s) | Fig. 1 c) | Title of the article/chapter the portion is from | Fabrication of single-chain nanoparticles through the dimerization of pendant anthracene groups via photochemical upconversion |
| Editor of portion(s)                                      | N/A       |                                                  |                                                                                                                                |
| Volume of serial or monograph                             | N/A       |                                                  |                                                                                                                                |
| Page or page range of portion                             | 2         | Author of portion(s)                             | Royal Society of Chemistry (Great Britain)                                                                                     |
|                                                           |           | Issue, if republishing an article from a serial  | N/A                                                                                                                            |
|                                                           |           | Publication date of portion                      | 2003-01-01                                                                                                                     |

Order Total: 0,00 EUR

Total Items: 1

Total Due: 0,00 EUR

Accepted: All Publisher and CCC Terms and Conditions

## Figure 5





RightsLink®

Home

Create Account

Help

ACS Publications  
Most Trusted. Most Cited. Most Read.

**Title:** Photochemistry in Confined Environments for Single-Chain Nanoparticle Design

**Author:** Hendrik Frisch, Jan P. Menzel, Fabian R. Bloesser, et al

**Publication:** Journal of the American Chemical Society

**Publisher:** American Chemical Society

**Date:** Aug 1, 2018

Copyright © 2018, American Chemical Society

## LOGIN

If you're a **copyright.com user**, you can login to RightsLink using your copyright.com credentials.

Already a **RightsLink user** or want to [learn more?](#)

**PERMISSION/LICENSE IS GRANTED FOR YOUR ORDER AT NO CHARGE**

This type of permission/license, instead of the standard Terms & Conditions, is sent to you because no fee is being charged for your order. Please note the following:

- Permission is granted for your request in both print and electronic formats, and translations.
- If figures and/or tables were requested, they may be adapted or used in part.
- Please print this page for your records and send a copy of it to your publisher/graduate school.
- Appropriate credit for the requested material should be given as follows: "Reprinted (adapted) with permission from (COMPLETE REFERENCE CITATION). Copyright (YEAR) American Chemical Society." Insert appropriate information in place of the capitalized words.
- One-time permission is granted only for the use specified in your request. No additional uses are granted (such as derivative works or other editions). For any other uses, please submit a new request.

If credit is given to another source for the material you requested, permission must be obtained from that source.

BACK

CLOSE WINDOW

Copyright © 2019 [Copyright Clearance Center, Inc.](#) All Rights Reserved. [Privacy statement.](#) [Terms and Conditions.](#)  
Comments? We would like to hear from you. E-mail us at [customercare@copyright.com](mailto:customercare@copyright.com)

## Figure 6



# RightsLink®

[Home](#)
[Account Info](#)
[Help](#)
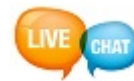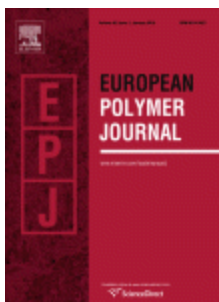

**Title:** Preparation of single chain nanoparticles via photoinduced radical coupling process

**Author:** Irem Dashan, Demet Karaca Balta, Binnur Aydogan Temel, Gokhan Temel

**Publication:** European Polymer Journal

**Publisher:** Elsevier

**Date:** April 2019

© 2019 Elsevier Ltd. All rights reserved.

Logged in as:  
Agustín Blázquez  
Materials Physic Center (MPC)  
Account #:  
3001540794

[LOGOUT](#)

## Order Completed

Thank you for your order.

This Agreement between Materials Physic Center (MPC) -- Agustín Blázquez ("You") and Elsevier ("Elsevier") consists of your license details and the terms and conditions provided by Elsevier and Copyright Clearance Center.

Your confirmation email will contain your order number for future reference.

### [printable details](#)

|                                                 |                                                                                     |
|-------------------------------------------------|-------------------------------------------------------------------------------------|
| License Number                                  | 4694760471703                                                                       |
| License date                                    | Oct 23, 2019                                                                        |
| Licensed Content Publisher                      | Elsevier                                                                            |
| Licensed Content Publication                    | European Polymer Journal                                                            |
| Licensed Content Title                          | Preparation of single chain nanoparticles via photoinduced radical coupling process |
| Licensed Content Author                         | Irem Dashan, Demet Karaca Balta, Binnur Aydogan Temel, Gokhan Temel                 |
| Licensed Content Date                           | Apr 1, 2019                                                                         |
| Licensed Content Volume                         | 113                                                                                 |
| Licensed Content Issue                          | n/a                                                                                 |
| Licensed Content Pages                          | 9                                                                                   |
| Type of Use                                     | reuse in a journal/magazine                                                         |
| Requestor type                                  | academic/educational institute                                                      |
| Intended publisher of new work                  | MDPI AG                                                                             |
| Portion                                         | figures/tables/illustrations                                                        |
| Number of figures/tables/illustrations          | 1                                                                                   |
| Format                                          | both print and electronic                                                           |
| Are you the author of this Elsevier article?    | No                                                                                  |
| Will you be translating?                        | No                                                                                  |
| Original figure numbers                         | Scheme 2                                                                            |
| Title of the article                            | Advances in Phototriggered Synthesis of Single-Chain Polymer Nanoparticles          |
| Publication new article is in                   | Polymers                                                                            |
| Publisher of the new article                    | MDPI AG                                                                             |
| Author of new article                           | Ester Verde-Sesto, Agustín Blázquez_Martín and José A. Pomposo                      |
| Expected publication date                       | Nov 2019                                                                            |
| Estimated size of new article (number of pages) | 20                                                                                  |
| Requestor Location                              | Materials Physic Center (MPC)<br>Paseo Manuel de Lardizabal, 5                      |

San Sebastian, Guipuzcoa 20018  
Spain  
Attn: Materials Physic Center (MPC)

Publisher Tax ID

GB 494 6272 12

Total

0.00 EUR

**ORDER MORE**

**CLOSE WINDOW**

Copyright © 2019 [Copyright Clearance Center, Inc.](#) All Rights Reserved. [Privacy statement.](#) [Terms and Conditions.](#)  
Comments? We would like to hear from you. E-mail us at [customercare@copyright.com](mailto:customercare@copyright.com)

## Figure 7

36. R. Chen , J. G. Dickinson , K. J. Rodriguez , A. M. Hanlon , E. B. Berda , C. Willis and M. Cashman , *Macromolecules*, 2017, **50** , 2996 —3003 [CrossRef](#)  .
37. H. Frisch , J. P. Menzel , F. R. Bloesser , D. E. Marschner , K. Mundsinger and C. Barner-Kowollik , *J. Am. Chem. Soc.*, 2018, **140** , 9551 —9557 [CrossRef](#) [CAS](#) [PubMed](#)  .
38. P. G. Frank , B. T. Tuten , A. Prasher , D. Chao and E. B. Berda , *Macromol. Rapid Commun.*, 2014, **35** , 249 —253 [CrossRef](#) [CAS](#) [PubMed](#)  .
39. J. T. Offenloch , J. Willenbacher , P. Tzvetkova , C. Heiler , H. Mutlu and C. Barner-Kowollik , *Chem. Commun.*, 2017, **53** , 775 —778 [RSC](#)  .
40. C. Heiler , S. Bastian , P. Lederhose , J. P. Blinco , E. Blasco and C. Barner-Kowollik , *Chem. Commun.*, 2018, **54** , 3476 —3479 [RSC](#)  .
41. J. T. Offenloch , S. Bastian , H. Mutlu and C. Barner-Kowollik , *ChemPhotoChem*, 2019, **3** , 66 —70 [CrossRef](#) [CAS](#)  .
42. J. P. Menzel , B. B. Noble , A. Lauer , M. L. Coote , J. P. Blinco and C. Barner-Kowollik , *J. Am. Chem. Soc.*, 2017, **139** , 15812 —15820 [CrossRef](#) [CAS](#) [PubMed](#)  .

## Footnote

† Electronic supplementary information (ESI) available. See DOI: [10.1039/c9py00834a](https://doi.org/10.1039/c9py00834a)

This journal is © The Royal Society of Chemistry 2019

About

Cited by

Related

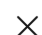

### Self-reporting visible light-induced polymer chain collapse

J. T. Offenloch, E. Blasco, S. Bastian, C. Barner-Kowollik and H. Mutlu, *Polym. Chem.*, 2019, **10**, 4513

DOI: 10.1039/C9PY00834A

This article is licensed under a [Creative Commons Attribution-NonCommercial 3.0 Unported Licence](#). Material from this article can be used in other publications provided that the correct acknowledgement is given with the reproduced material and it is not used for commercial purposes.

Reproduced material should be attributed as follows:

- For reproduction of material from NJC:  
[Original citation] - Published by The Royal Society of Chemistry (RSC) on behalf of the Centre National de la Recherche Scientifique (CNRS) and the RSC.
- For reproduction of material from PCCP:  
[Original citation] - Published by the PCCP Owner Societies.
- For reproduction of material from PPS:  
[Original citation] - Published by The Royal Society of Chemistry (RSC) on behalf of the European Society for Photobiology, the European Photochemistry Association, and RSC.
- For reproduction of material from all other RSC journals:  
[Original citation] - Published by The Royal Society of Chemistry.

Information about reproducing material from RSC articles with different licences is available on our [Permission Requests page](#).

✕

- ☐ Janin T. Offenloch
- ☐ Eva Blasco
- ☐ Simon Bastian
- ☐ Christopher Barner-Kowollik
- ☐ Hatice Mutlu

Go

---

This page is available in the following languages:

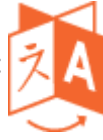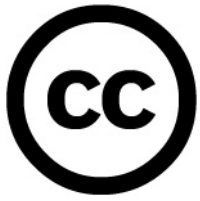

# Creative Commons License Deed

---

## Attribution-NonCommercial 3.0 Unported (CC BY-NC 3.0)

This is a human-readable summary of (and not a substitute for) the [license](https://creativecommons.org/licenses/by-nc/3.0/).

### You are free to:

**Share** — copy and redistribute the material in any medium or format

**Adapt** — remix, transform, and build upon the material

The licensor cannot revoke these freedoms as long as you follow the license terms.

### Under the following terms:

**Attribution** — You must give appropriate credit, provide a link to the license, and indicate if changes were made. You may do so in any reasonable manner, but not in any way that suggests the licensor endorses you or your use.

**NonCommercial** — You may not use the material for commercial purposes.

**No additional restrictions** — You may not apply legal terms or technological measures that legally restrict others from doing anything the license permits.

### Notices:

You do not have to comply with the license for elements of the material in the public domain or where your use is permitted by an applicable exception or limitation.

No warranties are given. The license may not give you all of the permissions necessary for your intended use. For example, other rights such as publicity, privacy, or moral rights may limit how you use the material.



## Figure 8



# RightsLink®

[Home](#)
[Account Info](#)
[Help](#)
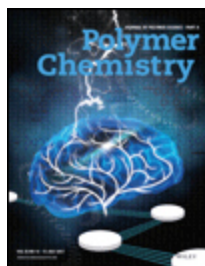

**Title:** A convergence of photo-bergman cyclization and intramolecular chain collapse towards polymeric nanoparticles

**Author:** Aiguo Hu, Meng Wang, Sheng Deng, et al

**Publication:** Journal of Polymer Science Part A: Polymer Chemistry

**Publisher:** John Wiley and Sons

**Date:** Oct 6, 2011

Copyright © 2011 Wiley Periodicals, Inc.

Logged in as:  
Agustín Blázquez  
Materials Physic Center (MPC)  
Account #:  
3001540794

[LOGOUT](#)

## Order Completed

Thank you for your order.

This Agreement between Materials Physic Center (MPC) -- Agustín Blázquez ("You") and John Wiley and Sons ("John Wiley and Sons") consists of your license details and the terms and conditions provided by John Wiley and Sons and Copyright Clearance Center.

Your confirmation email will contain your order number for future reference.

### [printable details](#)

|                                                                                            |                                                                                                              |
|--------------------------------------------------------------------------------------------|--------------------------------------------------------------------------------------------------------------|
| License Number                                                                             | 4694680945087                                                                                                |
| License date                                                                               | Oct 23, 2019                                                                                                 |
| Licensed Content Publisher                                                                 | John Wiley and Sons                                                                                          |
| Licensed Content Publication                                                               | Journal of Polymer Science Part A: Polymer Chemistry                                                         |
| Licensed Content Title                                                                     | A convergence of photo-bergman cyclization and intramolecular chain collapse towards polymeric nanoparticles |
| Licensed Content Author                                                                    | Aiguo Hu, Meng Wang, Sheng Deng, et al                                                                       |
| Licensed Content Date                                                                      | Oct 6, 2011                                                                                                  |
| Licensed Content Volume                                                                    | 49                                                                                                           |
| Licensed Content Issue                                                                     | 24                                                                                                           |
| Licensed Content Pages                                                                     | 9                                                                                                            |
| Type of use                                                                                | Journal/Magazine                                                                                             |
| Requestor type                                                                             | University/Academic                                                                                          |
| Is the reuse sponsored by or associated with a pharmaceutical or medical products company? | no                                                                                                           |
| Format                                                                                     | Print and electronic                                                                                         |
| Portion                                                                                    | Figure/table                                                                                                 |
| Number of figures/tables                                                                   | 1                                                                                                            |
| Original Wiley figure/table number(s)                                                      | Scheme 2                                                                                                     |
| Will you be translating?                                                                   | No                                                                                                           |
| Circulation                                                                                | 50000 or greater                                                                                             |
| Title of new article                                                                       | Advances in Phototriggered Synthesis of Single-Chain Polymer Nanoparticles                                   |
| Publication the new article is in                                                          | Polymers                                                                                                     |
| Publisher of new article                                                                   | MDPI                                                                                                         |
| Author of new article                                                                      | Ester Verde-Sesto, Agustín Blázquez_Martín and José A. Pomposo                                               |

|                                          |                                                                                                                                                      |
|------------------------------------------|------------------------------------------------------------------------------------------------------------------------------------------------------|
| Expected publication date of new article | Nov 2019                                                                                                                                             |
| Estimated size of new article (pages)    | 20                                                                                                                                                   |
| Requestor Location                       | Materials Physic Center (MPC)<br>Paseo Manuel de Lardizabal, 5<br><br>San Sebastian, Guipuzcoa 20018<br>Spain<br>Attn: Materials Physic Center (MPC) |
| Publisher Tax ID                         | EU826007151                                                                                                                                          |
| Total                                    | 0.00 EUR                                                                                                                                             |

**Would you like to purchase the full text of this article? If so, please continue on to the content ordering system located here: [Purchase PDF](#)**

**If you click on the buttons below or close this window, you will not be able to return to the content ordering system.**

[ORDER MORE](#)[CLOSE WINDOW](#)

Copyright © 2019 [Copyright Clearance Center, Inc.](#) All Rights Reserved. [Privacy statement.](#) [Terms and Conditions.](#)  
Comments? We would like to hear from you. E-mail us at [customercare@copyright.com](mailto:customercare@copyright.com)

## Figure 9



RightsLink®

[Home](#)[Account Info](#)[Help](#)ACS Publications  
Most Trusted. Most Cited. Most Read.**Title:**Photo- and Metallo-responsive  
N-Alkyl  $\alpha$ -Bisimines as  
Orthogonally Addressable Main-  
Chain Functional Groups in  
Metathesis Polymers**Logged in as:**Agustín Blázquez  
Materials Physic Center (MPC)  
Account #:  
3001540794**Author:**Lutz Greb, Hatice Mutlu,  
Christopher Barner-Kowollik, et  
al[LOGOUT](#)**Publication:**Journal of the American  
Chemical Society**Publisher:**

American Chemical Society

**Date:**

Feb 1, 2016

Copyright © 2016, American Chemical Society

**PERMISSION/LICENSE IS GRANTED FOR YOUR ORDER AT NO CHARGE**

This type of permission/license, instead of the standard Terms & Conditions, is sent to you because no fee is being charged for your order. Please note the following:

- Permission is granted for your request in both print and electronic formats, and translations.
- If figures and/or tables were requested, they may be adapted or used in part.
- Please print this page for your records and send a copy of it to your publisher/graduate school.
- Appropriate credit for the requested material should be given as follows: "Reprinted (adapted) with permission from (COMPLETE REFERENCE CITATION). Copyright (YEAR) American Chemical Society." Insert appropriate information in place of the capitalized words.
- One-time permission is granted only for the use specified in your request. No additional uses are granted (such as derivative works or other editions). For any other uses, please submit a new request.

If credit is given to another source for the material you requested, permission must be obtained from that source.

[BACK](#)[CLOSE WINDOW](#)

Copyright © 2019 [Copyright Clearance Center, Inc.](#) All Rights Reserved. [Privacy statement.](#) [Terms and Conditions.](#)  
Comments? We would like to hear from you. E-mail us at [customercare@copyright.com](mailto:customercare@copyright.com)

## Figure 10



# RightsLink®

[Home](#)
[Account Info](#)
[Help](#)
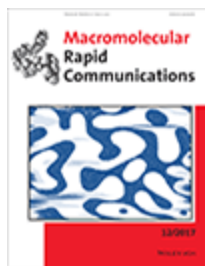

**Title:** Facile Access to Completely Deuterated Single-Chain Nanoparticles Enabled by Intramolecular Azide Photodecomposition

**Author:** José A. Pomposo, Juan Colmenero, Angel Alegría, et al

**Publication:** Macromolecular Rapid Communications

**Publisher:** John Wiley and Sons

**Date:** Feb 25, 2019

Logged in as:  
Agustín Blázquez  
Materials Physic Center (MPC)  
Account #:  
3001540794

[LOGOUT](#)

© 2019 WILEY-VCH Verlag GmbH & Co. KGaA, Weinheim

## Order Completed

Thank you for your order.

This Agreement between Materials Physic Center (MPC) -- Agustín Blázquez ("You") and John Wiley and Sons ("John Wiley and Sons") consists of your license details and the terms and conditions provided by John Wiley and Sons and Copyright Clearance Center.

Your confirmation email will contain your order number for future reference.

### [printable details](#)

|                                                                                            |                                                                                                                      |
|--------------------------------------------------------------------------------------------|----------------------------------------------------------------------------------------------------------------------|
| License Number                                                                             | 4694691200696                                                                                                        |
| License date                                                                               | Oct 23, 2019                                                                                                         |
| Licensed Content Publisher                                                                 | John Wiley and Sons                                                                                                  |
| Licensed Content Publication                                                               | Macromolecular Rapid Communications                                                                                  |
| Licensed Content Title                                                                     | Facile Access to Completely Deuterated Single-Chain Nanoparticles Enabled by Intramolecular Azide Photodecomposition |
| Licensed Content Author                                                                    | José A. Pomposo, Juan Colmenero, Angel Alegría, et al                                                                |
| Licensed Content Date                                                                      | Feb 25, 2019                                                                                                         |
| Licensed Content Volume                                                                    | 40                                                                                                                   |
| Licensed Content Issue                                                                     | 9                                                                                                                    |
| Licensed Content Pages                                                                     | 6                                                                                                                    |
| Type of use                                                                                | Journal/Magazine                                                                                                     |
| Requestor type                                                                             | University/Academic                                                                                                  |
| Is the reuse sponsored by or associated with a pharmaceutical or medical products company? | no                                                                                                                   |
| Format                                                                                     | Print and electronic                                                                                                 |
| Portion                                                                                    | Figure/table                                                                                                         |
| Number of figures/tables                                                                   | 1                                                                                                                    |
| Original Wiley figure/table number(s)                                                      | Scheme 1                                                                                                             |
| Will you be translating?                                                                   | No                                                                                                                   |
| Circulation                                                                                | 50000 or greater                                                                                                     |
| Title of new article                                                                       | Advances in Phototriggered Synthesis of Single-Chain Polymer Nanoparticles                                           |
| Publication the new article is in                                                          | Polymers                                                                                                             |
| Publisher of new article                                                                   | MDPI                                                                                                                 |

|                                          |                                                                                                                                                      |
|------------------------------------------|------------------------------------------------------------------------------------------------------------------------------------------------------|
| Author of new article                    | Ester Verde-Sesto, Agustín Blázquez_Martín and José A. Pomposo                                                                                       |
| Expected publication date of new article | Nov 2019                                                                                                                                             |
| Estimated size of new article (pages)    | 20                                                                                                                                                   |
| Requestor Location                       | Materials Physic Center (MPC)<br>Paseo Manuel de Lardizabal, 5<br><br>San Sebastian, Guipuzcoa 20018<br>Spain<br>Attn: Materials Physic Center (MPC) |
| Publisher Tax ID                         | EU826007151                                                                                                                                          |
| Total                                    | 0.00 EUR                                                                                                                                             |

**Would you like to purchase the full text of this article? If so, please continue on to the content ordering system located here: [Purchase PDF](#)**

**If you click on the buttons below or close this window, you will not be able to return to the content ordering system.**

[ORDER MORE](#)[CLOSE WINDOW](#)

Copyright © 2019 [Copyright Clearance Center, Inc.](#) All Rights Reserved. [Privacy statement](#). [Terms and Conditions](#).  
Comments? We would like to hear from you. E-mail us at [customercare@copyright.com](mailto:customercare@copyright.com)



Figure 11 and 12



Marketplace™

## Order Confirmation

This is not an invoice. Please go to manage account to access your order history and invoices.

### CUSTOMER INFORMATION

#### Billing Address

Mr. Agustín Blázquez  
Materials Physic Center (MPC)  
Paseo Manuel de Lardizabal, 5  
San Sebastian, Guipuzcoa 20018  
Spain  
  
+34 608390647  
agustinblazquezmartin@gmail.com

#### Customer Location

Mr. Agustín Blázquez  
Materials Physic Center (MPC)  
Paseo Manuel de Lardizabal, 5  
San Sebastian, Guipuzcoa 20018  
Spain

#### PO Number (optional)

N/A

#### Payment options

Invoice

### PENDING ORDER CONFIRMATION

Total Due: 0,00 EUR

Confirmation Number: Pending

Order Date: 24-Oct-2019

#### 1. Journal of the Chinese Chemical Society

0,00 EUR

Order license ID  
ISSN  
Type of Use  
Publisher  
Portion

Pending  
0009-4536  
Republish in a journal/magazine  
THE SOCIETY,  
Image/photo/illustration

### LICENSED CONTENT

|                   |                                                |                  |                              |
|-------------------|------------------------------------------------|------------------|------------------------------|
| Publication Title | Journal of the Chinese Chemical Society        | Country          | China                        |
| Author/Editor     | CHUNG-KUO HUA<br>HSUEH HUI (TAIPEI,<br>TAIWAN) | Rightsholder     | John Wiley & Sons -<br>Books |
| Date              | 01/01/1954                                     | Publication Type | Journal                      |
| Language          | English                                        |                  |                              |

### REQUEST DETAILS

|                                           |                          |                             |                                  |
|-------------------------------------------|--------------------------|-----------------------------|----------------------------------|
| Portion Type                              | Image/photo/illustration | Distribution                | Worldwide                        |
| Number of images / photos / illustrations | 2                        | Translation                 | Original language of publication |
| Format (select all that apply)            | Print, Electronic        | Copies for the disabled?    | No                               |
| Who will republish the content?           | Not-for-profit entity    | Minor editing privileges?   | No                               |
| Duration of Use                           | Life of current edition  | Incidental promotional use? | No                               |
| Lifetime Unit Quantity                    | More than 2,000,000      | Currency                    | EUR                              |
| Rights Requested                          | Main product             |                             |                                  |

## NEW WORK DETAILS

|             |                                                                            |                                 |            |
|-------------|----------------------------------------------------------------------------|---------------------------------|------------|
| Title       | Advances in Phototriggered Synthesis of Single-Chain Polymer Nanoparticles | Publisher imprint               | N/A        |
|             |                                                                            | Expected publication date       | 2019-11-20 |
| Author      | Ester Verde-Sesto, Agustín Blázquez-Martín and José A. Pomposo             | Expected size (number of pages) | 20         |
|             |                                                                            | Standard identifier             | N/A        |
| Publication | Polymers                                                                   |                                 |            |
| Publisher   | MDPI                                                                       |                                 |            |

## ADDITIONAL DETAILS

|                        |     |                                                               |                                                 |
|------------------------|-----|---------------------------------------------------------------|-------------------------------------------------|
| Order reference number | N/A | The requesting person / organization to appear on the license | Agustín Blázquez, Materials Physic Center (MPC) |
|------------------------|-----|---------------------------------------------------------------|-------------------------------------------------|

## REUSE CONTENT DETAILS

|                                                           |                       |                                                  |                                                     |
|-----------------------------------------------------------|-----------------------|--------------------------------------------------|-----------------------------------------------------|
| Title, description or numeric reference of the portion(s) | Figure 7 and Figure 8 | Title of the article/chapter the portion is from | Supramolecular Single-Chain Polymeric Nanoparticles |
| Editor of portion(s)                                      | N/A                   | Author of portion(s)                             | CHUNG-KUO HUA<br>HSUEH HUI (TAIPEI, TAIWAN)         |
| Volume of serial or monograph                             | N/A                   |                                                  |                                                     |
| Page or page range of portion                             | 68 and 69             | Issue, if republishing an article from a serial  | N/A                                                 |
|                                                           |                       | Publication date of portion                      | 1963-08-10                                          |

## PUBLISHER TERMS AND CONDITIONS

No right, license or interest to any trademark, trade name, service mark or other branding ("Marks") of WILEY or its licensors is granted hereunder, and you agree that you shall not assert any such right, license or interest with respect thereto. You may not alter, remove or suppress in any manner any copyright, trademark or other notices displayed by the Wiley material. This Agreement will be void if the Type of Use, Format, Circulation, or Requestor Type was misrepresented during the licensing process. In no instance may the total amount of Wiley Materials used in any Main Product, Compilation or Collective work comprise more than 5% (if figures/tables) or 15% (if full articles/chapters) of the (entirety of the) Main Product, Compilation or Collective Work. Some titles may be available under an Open Access license. It is the Licensors' responsibility to identify the type of Open Access license on which the requested material was published, and comply fully with the terms of that license for the type of use specified. Further details can be found on Wiley Online Library <http://olabout.wiley.com/WileyCDA/Section/id-410895.html>.

Order Total: 0,00 EUR

Total Items: 1

Total Due: 0,00 EUR

Accepted: All Publisher and CCC Terms and Conditions

## Figure 13



RightsLink®

[Home](#)[Account Info](#)[Help](#)ACS Publications  
Most Trusted. Most Cited. Most Read.**Title:**A Mild and Efficient Approach to  
Functional Single-Chain  
Polymeric Nanoparticles via  
Photoinduced Diels–Alder  
Ligation

Logged in as:

Agustín Blázquez  
Materials Physic Center (MPC)Account #:  
3001540794**Author:**Ozcan Altintas, Johannes  
Willenbacher, Kilian N. R. Wuest,  
et al[LOGOUT](#)**Publication:** Macromolecules**Publisher:** American Chemical Society**Date:** Oct 1, 2013

Copyright © 2013, American Chemical Society

**PERMISSION/LICENSE IS GRANTED FOR YOUR ORDER AT NO CHARGE**

This type of permission/license, instead of the standard Terms & Conditions, is sent to you because no fee is being charged for your order. Please note the following:

- Permission is granted for your request in both print and electronic formats, and translations.
- If figures and/or tables were requested, they may be adapted or used in part.
- Please print this page for your records and send a copy of it to your publisher/graduate school.
- Appropriate credit for the requested material should be given as follows: "Reprinted (adapted) with permission from (COMPLETE REFERENCE CITATION). Copyright (YEAR) American Chemical Society." Insert appropriate information in place of the capitalized words.
- One-time permission is granted only for the use specified in your request. No additional uses are granted (such as derivative works or other editions). For any other uses, please submit a new request.

If credit is given to another source for the material you requested, permission must be obtained from that source.

[BACK](#)[CLOSE WINDOW](#)

Copyright © 2019 [Copyright Clearance Center, Inc.](#) All Rights Reserved. [Privacy statement.](#) [Terms and Conditions.](#)  
Comments? We would like to hear from you. E-mail us at [customercare@copyright.com](mailto:customercare@copyright.com)

## Figure 14



RightsLink®

[Home](#)[Account Info](#)[Help](#)ACS Publications  
Most Trusted. Most Cited. Most Read.**Title:**Photochemical Design of  
Functional Fluorescent Single-  
Chain Nanoparticles**Author:**Johannes Willenbacher, Kilian N.  
R. Wuest, Jan O. Mueller, et al**Publication:**

ACS Macro Letters

**Publisher:**

American Chemical Society

**Date:**

Jun 1, 2014

Copyright © 2014, American Chemical Society

Logged in as:

Agustín Blázquez  
Materials Physic Center (MPC)Account #:  
3001540794[LOGOUT](#)**PERMISSION/LICENSE IS GRANTED FOR YOUR ORDER AT NO CHARGE**

This type of permission/license, instead of the standard Terms & Conditions, is sent to you because no fee is being charged for your order. Please note the following:

- Permission is granted for your request in both print and electronic formats, and translations.
- If figures and/or tables were requested, they may be adapted or used in part.
- Please print this page for your records and send a copy of it to your publisher/graduate school.
- Appropriate credit for the requested material should be given as follows: "Reprinted (adapted) with permission from (COMPLETE REFERENCE CITATION). Copyright (YEAR) American Chemical Society." Insert appropriate information in place of the capitalized words.
- One-time permission is granted only for the use specified in your request. No additional uses are granted (such as derivative works or other editions). For any other uses, please submit a new request.

If credit is given to another source for the material you requested, permission must be obtained from that source.

[BACK](#)[CLOSE WINDOW](#)

Copyright © 2019 [Copyright Clearance Center, Inc.](#) All Rights Reserved. [Privacy statement.](#) [Terms and Conditions.](#)  
Comments? We would like to hear from you. E-mail us at [customercare@copyright.com](mailto:customercare@copyright.com)



## Figure 15



RightsLink®

[Home](#)[Account Info](#)[Help](#)ACS Publications  
Most Trusted. Most Cited. Most Read.**Title:**Efficient Route to Compact  
Single-Chain Nanoparticles:  
Photoactivated Synthesis via  
Thiol-Yne Coupling Reaction**Logged in as:**Agustín Blázquez  
Materials Physic Center (MPC)  
Account #:  
3001540794**Author:**Irma Perez-Baena, Isabel  
Asenjo-Sanz, Arantxa Arbe, et al[LOGOUT](#)**Publication:** Macromolecules**Publisher:** American Chemical Society**Date:** Dec 1, 2014

Copyright © 2014, American Chemical Society

**PERMISSION/LICENSE IS GRANTED FOR YOUR ORDER AT NO CHARGE**

This type of permission/license, instead of the standard Terms & Conditions, is sent to you because no fee is being charged for your order. Please note the following:

- Permission is granted for your request in both print and electronic formats, and translations.
- If figures and/or tables were requested, they may be adapted or used in part.
- Please print this page for your records and send a copy of it to your publisher/graduate school.
- Appropriate credit for the requested material should be given as follows: "Reprinted (adapted) with permission from (COMPLETE REFERENCE CITATION). Copyright (YEAR) American Chemical Society." Insert appropriate information in place of the capitalized words.
- One-time permission is granted only for the use specified in your request. No additional uses are granted (such as derivative works or other editions). For any other uses, please submit a new request.

If credit is given to another source for the material you requested, permission must be obtained from that source.

[BACK](#)[CLOSE WINDOW](#)

Copyright © 2019 [Copyright Clearance Center, Inc.](#) All Rights Reserved. [Privacy statement.](#) [Terms and Conditions.](#)  
Comments? We would like to hear from you. E-mail us at [customercare@copyright.com](mailto:customercare@copyright.com)

## Figure 16



# RightsLink®

[Home](#)
[Account Info](#)
[Help](#)
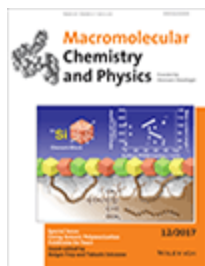

**Title:** Preparation of Single Chain Nanoparticles via Photoinduced Double Collapse Process

**Author:** Irem Dashan, Demet Karaca Balta, Binnur Aydogan Temel, et al

**Publication:** Macromolecular Chemistry and Physics

**Publisher:** John Wiley and Sons

**Date:** Apr 24, 2019

© 2019 WILEY-VCH Verlag GmbH & Co. KGaA, Weinheim

Logged in as:  
Agustín Blázquez  
Materials Physic Center (MPC)  
Account #:  
3001540794

[LOGOUT](#)

## Order Completed

Thank you for your order.

This Agreement between Materials Physic Center (MPC) -- Agustín Blázquez ("You") and John Wiley and Sons ("John Wiley and Sons") consists of your license details and the terms and conditions provided by John Wiley and Sons and Copyright Clearance Center.

Your confirmation email will contain your order number for future reference.

### [printable details](#)

|                                                                                            |                                                                                    |
|--------------------------------------------------------------------------------------------|------------------------------------------------------------------------------------|
| License Number                                                                             | 4694740492170                                                                      |
| License date                                                                               | Oct 23, 2019                                                                       |
| Licensed Content Publisher                                                                 | John Wiley and Sons                                                                |
| Licensed Content Publication                                                               | Macromolecular Chemistry and Physics                                               |
| Licensed Content Title                                                                     | Preparation of Single Chain Nanoparticles via Photoinduced Double Collapse Process |
| Licensed Content Author                                                                    | Irem Dashan, Demet Karaca Balta, Binnur Aydogan Temel, et al                       |
| Licensed Content Date                                                                      | Apr 24, 2019                                                                       |
| Licensed Content Volume                                                                    | 220                                                                                |
| Licensed Content Issue                                                                     | 10                                                                                 |
| Licensed Content Pages                                                                     | 6                                                                                  |
| Type of use                                                                                | Journal/Magazine                                                                   |
| Requestor type                                                                             | University/Academic                                                                |
| Is the reuse sponsored by or associated with a pharmaceutical or medical products company? | no                                                                                 |
| Format                                                                                     | Print and electronic                                                               |
| Portion                                                                                    | Figure/table                                                                       |
| Number of figures/tables                                                                   | 1                                                                                  |
| Original Wiley figure/table number(s)                                                      | Scheme 2                                                                           |
| Will you be translating?                                                                   | No                                                                                 |
| Circulation                                                                                | 50000 or greater                                                                   |
| Title of new article                                                                       | Advances in Phototriggered Synthesis of Single-Chain Polymer Nanoparticles         |
| Publication the new article is in                                                          | Polymers                                                                           |
| Publisher of new article                                                                   | MDPI                                                                               |
| Author of new article                                                                      | Ester Verde-Sesto, Agustín Blázquez_Martín and José A. Pomposo                     |

|                                          |                                                                                                                                                      |
|------------------------------------------|------------------------------------------------------------------------------------------------------------------------------------------------------|
| Expected publication date of new article | Nov 2019                                                                                                                                             |
| Estimated size of new article (pages)    | 20                                                                                                                                                   |
| Requestor Location                       | Materials Physic Center (MPC)<br>Paseo Manuel de Lardizabal, 5<br><br>San Sebastian, Guipuzcoa 20018<br>Spain<br>Attn: Materials Physic Center (MPC) |
| Publisher Tax ID                         | EU826007151                                                                                                                                          |
| Total                                    | 0.00 EUR                                                                                                                                             |

**Would you like to purchase the full text of this article? If so, please continue on to the content ordering system located here: [Purchase PDF](#)**

**If you click on the buttons below or close this window, you will not be able to return to the content ordering system.**

[ORDER MORE](#)[CLOSE WINDOW](#)

Copyright © 2019 [Copyright Clearance Center, Inc.](#) All Rights Reserved. [Privacy statement.](#) [Terms and Conditions.](#)  
Comments? We would like to hear from you. E-mail us at [customercare@copyright.com](mailto:customercare@copyright.com)

## Figure 17



# RightsLink®

[Home](#)
[Account Info](#)
[Help](#)


**Title:** Wavelength-Selective Folding of Single Polymer Chains with Different Colors of Visible Light

**Author:** Hendrik Frisch, Daniel Kodura, Fabian R. Bloesser, et al

**Publication:** Macromolecular Rapid Communications

**Publisher:** John Wiley and Sons

**Date:** Sep 10, 2019

Logged in as:  
Agustín Blázquez  
Materials Physic Center (MPC)  
Account #:  
3001540794

[LOGOUT](#)

© 2019 WILEY-VCH Verlag GmbH & Co. KGaA, Weinheim

## Order Completed

Thank you for your order.

This Agreement between Materials Physic Center (MPC) -- Agustín Blázquez ("You") and John Wiley and Sons ("John Wiley and Sons") consists of your license details and the terms and conditions provided by John Wiley and Sons and Copyright Clearance Center.

Your confirmation email will contain your order number for future reference.

### [printable details](#)

|                                                                                            |                                                                                              |
|--------------------------------------------------------------------------------------------|----------------------------------------------------------------------------------------------|
| License Number                                                                             | 4694740865041                                                                                |
| License date                                                                               | Oct 23, 2019                                                                                 |
| Licensed Content Publisher                                                                 | John Wiley and Sons                                                                          |
| Licensed Content Publication                                                               | Macromolecular Rapid Communications                                                          |
| Licensed Content Title                                                                     | Wavelength-Selective Folding of Single Polymer Chains with Different Colors of Visible Light |
| Licensed Content Author                                                                    | Hendrik Frisch, Daniel Kodura, Fabian R. Bloesser, et al                                     |
| Licensed Content Date                                                                      | Sep 10, 2019                                                                                 |
| Licensed Content Volume                                                                    | 0                                                                                            |
| Licensed Content Issue                                                                     | 0                                                                                            |
| Licensed Content Pages                                                                     | 6                                                                                            |
| Type of use                                                                                | Journal/Magazine                                                                             |
| Requestor type                                                                             | University/Academic                                                                          |
| Is the reuse sponsored by or associated with a pharmaceutical or medical products company? | no                                                                                           |
| Format                                                                                     | Print and electronic                                                                         |
| Portion                                                                                    | Figure/table                                                                                 |
| Number of figures/tables                                                                   | 1                                                                                            |
| Original Wiley figure/table number(s)                                                      | Figure 1                                                                                     |
| Will you be translating?                                                                   | No                                                                                           |
| Circulation                                                                                | 50000 or greater                                                                             |
| Title of new article                                                                       | Advances in Phototriggered Synthesis of Single-Chain Polymer Nanoparticles                   |
| Publication the new article is in                                                          | Polymers                                                                                     |
| Publisher of new article                                                                   | MDPI                                                                                         |
| Author of new article                                                                      | Ester Verde-Sesto, Agustín Blázquez_Martín and José A. Pomposo                               |
| Expected publication                                                                       | Nov 2019                                                                                     |

date of new article

Estimated size of new  
article (pages) 20Requestor Location Materials Physic Center (MPC)  
Paseo Manuel de Lardizabal, 5San Sebastian, Guipuzcoa 20018  
Spain  
Attn: Materials Physic Center (MPC)

Publisher Tax ID EU826007151

Total 0.00 EUR

**Would you like to purchase the full text of this article? If so, please continue on to the content ordering system located here: [Purchase PDF](#)**

**If you click on the buttons below or close this window, you will not be able to return to the content ordering system.**

[ORDER MORE](#)[CLOSE WINDOW](#)

Copyright © 2019 [Copyright Clearance Center, Inc.](#) All Rights Reserved. [Privacy statement.](#) [Terms and Conditions.](#)  
Comments? We would like to hear from you. E-mail us at [customercare@copyright.com](mailto:customercare@copyright.com)



## Figure 18



# RightsLink®

[Home](#)
[Account Info](#)
[Help](#)


**Title:** Stepwise Light-Induced Dual Compaction of Single-Chain Nanoparticles

**Author:** Christopher Barner-Kowollik, Guillaume Delaittre, Sébastien Perrier, et al

**Publication:** Macromolecular Rapid Communications

**Publisher:** John Wiley and Sons

**Date:** Jul 4, 2017

© 2017 WILEY-VCH Verlag GmbH & Co. KGaA, Weinheim

Logged in as:

Agustín Blázquez  
Materials Physic Center (MPC)

Account #:  
3001540794

[LOGOUT](#)

## Order Completed

Thank you for your order.

This Agreement between Materials Physic Center (MPC) -- Agustín Blázquez ("You") and John Wiley and Sons ("John Wiley and Sons") consists of your license details and the terms and conditions provided by John Wiley and Sons and Copyright Clearance Center.

Your confirmation email will contain your order number for future reference.

### [printable details](#)

|                                                                                            |                                                                            |
|--------------------------------------------------------------------------------------------|----------------------------------------------------------------------------|
| License Number                                                                             | 4694750001269                                                              |
| License date                                                                               | Oct 23, 2019                                                               |
| Licensed Content Publisher                                                                 | John Wiley and Sons                                                        |
| Licensed Content Publication                                                               | Macromolecular Rapid Communications                                        |
| Licensed Content Title                                                                     | Stepwise Light-Induced Dual Compaction of Single-Chain Nanoparticles       |
| Licensed Content Author                                                                    | Christopher Barner-Kowollik, Guillaume Delaittre, Sébastien Perrier, et al |
| Licensed Content Date                                                                      | Jul 4, 2017                                                                |
| Licensed Content Volume                                                                    | 38                                                                         |
| Licensed Content Issue                                                                     | 16                                                                         |
| Licensed Content Pages                                                                     | 7                                                                          |
| Type of use                                                                                | Journal/Magazine                                                           |
| Requestor type                                                                             | University/Academic                                                        |
| Is the reuse sponsored by or associated with a pharmaceutical or medical products company? | no                                                                         |
| Format                                                                                     | Print and electronic                                                       |
| Portion                                                                                    | Figure/table                                                               |
| Number of figures/tables                                                                   | 1                                                                          |
| Original Wiley figure/table number(s)                                                      | Scheme 1                                                                   |
| Will you be translating?                                                                   | No                                                                         |
| Circulation                                                                                | 50000 or greater                                                           |
| Title of new article                                                                       | Advances in Phototriggered Synthesis of Single-Chain Polymer Nanoparticles |
| Publication the new article is in                                                          | Polymers                                                                   |
| Publisher of new article                                                                   | MDPI                                                                       |
| Author of new article                                                                      | Ester Verde-Sesto, Agustín Blázquez_Martín and José A. Pomposo             |

|                                          |                                                                                                                                                      |
|------------------------------------------|------------------------------------------------------------------------------------------------------------------------------------------------------|
| Expected publication date of new article | Nov 2019                                                                                                                                             |
| Estimated size of new article (pages)    | 20                                                                                                                                                   |
| Requestor Location                       | Materials Physic Center (MPC)<br>Paseo Manuel de Lardizabal, 5<br><br>San Sebastian, Guipuzcoa 20018<br>Spain<br>Attn: Materials Physic Center (MPC) |
| Publisher Tax ID                         | EU826007151                                                                                                                                          |
| Total                                    | 0.00 EUR                                                                                                                                             |

**Would you like to purchase the full text of this article? If so, please continue on to the content ordering system located here: [Purchase PDF](#)**

**If you click on the buttons below or close this window, you will not be able to return to the content ordering system.**

[ORDER MORE](#)[CLOSE WINDOW](#)

Copyright © 2019 [Copyright Clearance Center, Inc.](#) All Rights Reserved. [Privacy statement.](#) [Terms and Conditions.](#)  
Comments? We would like to hear from you. E-mail us at [customercare@copyright.com](mailto:customercare@copyright.com)

## Figure 19



Marketplace™

## Order Confirmation

This is not an invoice. Please go to manage account to access your order history and invoices.

### CUSTOMER INFORMATION

#### Billing Address

Mr. Agustín Blázquez  
Materials Physic Center (MPC)  
Paseo Manuel de Lardizabal, 5  
San Sebastian, Guipuzcoa 20018  
Spain  
  
+34 608390647  
agustinblazquezmartin@gmail.com

#### Customer Location

Mr. Agustín Blázquez  
Materials Physic Center (MPC)  
Paseo Manuel de Lardizabal, 5  
San Sebastian, Guipuzcoa 20018  
Spain

#### PO Number (optional)

N/A

#### Payment options

Invoice

### PENDING ORDER CONFIRMATION

Total Due: 0,00 EUR

Confirmation Number: Pending

Order Date: 24-Oct-2019

#### 1. Chemical communications

0,00 EUR

|                  |                                 |
|------------------|---------------------------------|
| Order license ID | Pending                         |
| ISSN             | 1364-548X                       |
| Type of Use      | Republish in a journal/magazine |
| Publisher        | ROYAL SOCIETY OF CHEMISTRY      |
| Portion          | Image/photo/illustration        |

### LICENSED CONTENT

|                   |                                            |                  |                                                      |
|-------------------|--------------------------------------------|------------------|------------------------------------------------------|
| Publication Title | Chemical communications                    | Country          | United Kingdom of Great Britain and Northern Ireland |
| Author/Editor     | Royal Society of Chemistry (Great Britain) | Rightsholder     | Royal Society of Chemistry                           |
| Date              | 01/01/1996                                 | Publication Type | e-Journal                                            |
| Language          | English                                    |                  |                                                      |

### REQUEST DETAILS

|              |                          |              |           |
|--------------|--------------------------|--------------|-----------|
| Portion Type | Image/photo/illustration | Distribution | Worldwide |
|--------------|--------------------------|--------------|-----------|

|                                           |                         |                             |                                  |
|-------------------------------------------|-------------------------|-----------------------------|----------------------------------|
| Number of images / photos / illustrations | 1                       | Translation                 | Original language of publication |
| Format (select all that apply)            | Print, Electronic       | Copies for the disabled?    | No                               |
| Who will republish the content?           | Not-for-profit entity   | Minor editing privileges?   | Yes                              |
| Duration of Use                           | Life of current edition | Incidental promotional use? | No                               |
| Lifetime Unit Quantity                    | More than 2,000,000     | Currency                    | EUR                              |
| Rights Requested                          | Main product            |                             |                                  |

## NEW WORK DETAILS

|             |                                                                            |                                 |            |
|-------------|----------------------------------------------------------------------------|---------------------------------|------------|
| Title       | Advances in Phototriggered Synthesis of Single-Chain Polymer Nanoparticles | Publisher imprint               | N/A        |
|             |                                                                            | Expected publication date       | 2019-11-20 |
| Author      | Ester Verde-Sesto, Agustín Blázquez-Martín and José A. Pomposo             | Expected size (number of pages) | 20         |
|             |                                                                            | Standard identifier             | N/A        |
| Publication | Polymers                                                                   |                                 |            |
| Publisher   | MDPI                                                                       |                                 |            |

## ADDITIONAL DETAILS

|                        |     |                                                               |                                                 |
|------------------------|-----|---------------------------------------------------------------|-------------------------------------------------|
| Order reference number | N/A | The requesting person / organization to appear on the license | Agustín Blázquez, Materials Physic Center (MPC) |
|------------------------|-----|---------------------------------------------------------------|-------------------------------------------------|

## REUSE CONTENT DETAILS

|                                                           |        |                                                  |                                                                                                                                     |
|-----------------------------------------------------------|--------|--------------------------------------------------|-------------------------------------------------------------------------------------------------------------------------------------|
| Title, description or numeric reference of the portion(s) | Fig. 1 | Title of the article/chapter the portion is from | Photodegradable and size-tunable single-chain nanoparticles prepared from a single main-chain coumarin-containing polymer precursor |
| Editor of portion(s)                                      | N/A    |                                                  |                                                                                                                                     |
| Volume of serial or monograph                             | N/A    | Author of portion(s)                             | Royal Society of Chemistry (Great Britain)                                                                                          |
| Page or page range of portion                             | 2      | Issue, if republishing an article from a serial  | N/A                                                                                                                                 |
|                                                           |        | Publication date of portion                      | 1996-01-01                                                                                                                          |

Order Total: 0,00 EUR

Total Items: 1

Total Due: 0,00 EUR

Accepted: All Publisher and CCC Terms and Conditions

## Figure 20



# RightsLink®

[Home](#)
[Account Info](#)
[Help](#)


**Title:** Synthesis of photoactive single-chain folded polymeric nanoparticles via combination of radical polymerization techniques and Menschutkin click chemistry

**Author:** Gokhan Temel, Demet Karaca Balta, Secil Babaoglu

**Publication:** Journal of Polymer Science Part A: Polymer Chemistry

**Publisher:** John Wiley and Sons

**Date:** Mar 21, 2017

© 2017 Wiley Periodicals, Inc.

Logged in as:

Agustín Blázquez  
Materials Physic Center (MPC)

Account #:  
3001540794

[LOGOUT](#)

## Order Completed

Thank you for your order.

This Agreement between Materials Physic Center (MPC) -- Agustín Blázquez ("You") and John Wiley and Sons ("John Wiley and Sons") consists of your license details and the terms and conditions provided by John Wiley and Sons and Copyright Clearance Center.

Your confirmation email will contain your order number for future reference.

### [printable details](#)

|                                                                                            |                                                                                                                                                           |
|--------------------------------------------------------------------------------------------|-----------------------------------------------------------------------------------------------------------------------------------------------------------|
| License Number                                                                             | 4694750588521                                                                                                                                             |
| License date                                                                               | Oct 23, 2019                                                                                                                                              |
| Licensed Content Publisher                                                                 | John Wiley and Sons                                                                                                                                       |
| Licensed Content Publication                                                               | Journal of Polymer Science Part A: Polymer Chemistry                                                                                                      |
| Licensed Content Title                                                                     | Synthesis of photoactive single-chain folded polymeric nanoparticles via combination of radical polymerization techniques and Menschutkin click chemistry |
| Licensed Content Author                                                                    | Gokhan Temel, Demet Karaca Balta, Secil Babaoglu                                                                                                          |
| Licensed Content Date                                                                      | Mar 21, 2017                                                                                                                                              |
| Licensed Content Volume                                                                    | 55                                                                                                                                                        |
| Licensed Content Issue                                                                     | 12                                                                                                                                                        |
| Licensed Content Pages                                                                     | 6                                                                                                                                                         |
| Type of use                                                                                | Journal/Magazine                                                                                                                                          |
| Requestor type                                                                             | University/Academic                                                                                                                                       |
| Is the reuse sponsored by or associated with a pharmaceutical or medical products company? | no                                                                                                                                                        |
| Format                                                                                     | Print and electronic                                                                                                                                      |
| Portion                                                                                    | Figure/table                                                                                                                                              |
| Number of figures/tables                                                                   | 1                                                                                                                                                         |
| Original Wiley figure/table number(s)                                                      | Scheme 2                                                                                                                                                  |
| Will you be translating?                                                                   | No                                                                                                                                                        |
| Circulation                                                                                | 50000 or greater                                                                                                                                          |
| Title of new article                                                                       | Advances in Phototriggered Synthesis of Single-Chain Polymer Nanoparticles                                                                                |
| Publication the new article is in                                                          | Polymers                                                                                                                                                  |
| Publisher of new article                                                                   | MDPI                                                                                                                                                      |



|                                          |                                                                                                                                                      |
|------------------------------------------|------------------------------------------------------------------------------------------------------------------------------------------------------|
| Author of new article                    | Ester Verde-Sesto, Agustín Blázquez_Martín and José A. Pomposo                                                                                       |
| Expected publication date of new article | Nov 2019                                                                                                                                             |
| Estimated size of new article (pages)    | 20                                                                                                                                                   |
| Requestor Location                       | Materials Physic Center (MPC)<br>Paseo Manuel de Lardizabal, 5<br><br>San Sebastian, Guipuzcoa 20018<br>Spain<br>Attn: Materials Physic Center (MPC) |
| Publisher Tax ID                         | EU826007151                                                                                                                                          |
| Total                                    | 0.00 EUR                                                                                                                                             |

**Would you like to purchase the full text of this article? If so, please continue on to the content ordering system located here: [Purchase PDF](#)**

**If you click on the buttons below or close this window, you will not be able to return to the content ordering system.**

[ORDER MORE](#)[CLOSE WINDOW](#)

Copyright © 2019 [Copyright Clearance Center, Inc.](#) All Rights Reserved. [Privacy statement.](#) [Terms and Conditions.](#)  
Comments? We would like to hear from you. E-mail us at [customercare@copyright.com](mailto:customercare@copyright.com)
